# Supplementary material
Source: publisher figshare collection journal article supplement (https://tandf.figshare.com/articles/dataset/_/14480999)
Supplement: Supplementary file 1 [file 1]

## Sheet: Leningrad
	P31	Ti49	Y89	Nb93	La139	Ce140	Pr141	Nd143	Sm147	Eu151	Gd155	Tb159	Dy163	Ho165	Er166	Tm169	Yb173	Lu175	Hf179	Ta181	Pb204	Pb206	Pb207	Pb208	Th232	U238		ΣREE	Nb/Ta	Eu/Eu*	Ce/Ce*	Yb/Sm	Yb/Smn	Th/U
LEN_1	142.96	3.96	358.77	0.404	0.0042	5.22	0.039	0.57	1.81	0.738	7.64	2.64	28.92	11.25	55.67	14.85	174.96	32.51	9330.03	0.157		28.71	2.099	2.51	29.61	47.07		336.821	2.57325	0.60495	98.6737	88.8579	88.8579	0.629063
LEN_2		9.67	77.41	0.98		5.58	0.049	1.33	2.5	0.424	6.67	1.358	10.12	2.53	8.11	1.297	12.73	1.605	9222.02	0.365		229.57	29.62	14.67	79.8	162.31		54.303	2.68493	0.316506		4.68084	4.68084	0.491652
LEN_3	112.54	2.69	182.43	2.24	0.0218	6.05	0.0201	0.118	0.51	0.161	1.73	1.043	14.04	6.23	30.81	8.25	96.57	16.49	10583.8	1.552		71.12	4.14	1.71	60.59	379.4		182.044	1.4433	0.522476	69.9225	174.064	174.064	0.1597
LEN_4	299.78	19.68	440.06	1.42	0.044	3.33	0.172	2.38	3.72	0.149	13.04	4.23	44.15	15.04	60.43	13.25	127.28	19.27	8809.41	0.313	0.93	159.05	20.81	4.39	23.75	111.69		306.485	4.53674	0.0652116	9.26065	31.4523	31.4523	0.212642
LEN_5	181.86	19.26	502.35	0.235	0.0139	2.78	0.05	0.85	1.24	0.734	7.31	2.86	39.2	17.1	83.86	20.35	222.91	38.53	5110.88	0.072		3.15	<0,311	0.239	9.83	17.66		437.788	3.26389	0.743148	25.5117	165.251	165.251	0.556625
LEN_6		11.75	257.84	0.447	0.0088	4.4	0.034	0.63	1.18	0.255	5.99	2.16	24.2	9.17	39.46	9.28	98.34	15.95	6407.59	0.199		4.96	0.291	0.361	15.3	28.84		211.058	2.24623	0.292371	61.5403	76.6097	76.6097	0.530513
LEN_7		3.05	356.11	0.98	0.107	5.85	0.039	0.51	1.35	0.699	6.36	2.37	27.15	10.39	50.54	13.04	161.47	29.69	10090.8	0.165		17.13	0.917	0.435	35.51	210.3		309.565	5.93939	0.727161	21.9088	109.95	109.95	0.168854
LEN_8	350.78	8.21	2330.94	1.38	0.117	13.04	0.535	6.63	12.88	0.507	57.52	20.85	236.12	84.95	358.34	78.08	773.99	118.13	7336.53	0.544	0.88	116.84	7.95	12.54	216.73	286.55		1761.69	2.53676	0.0567792	12.6094	55.2402	55.2402	0.756343
LEN_9	223.7	23.2	2011.25	4.24	0.797	112.79	0.684	8.85	12.36	4.64	50.83	17.12	196.52	72.72	313.73	69.58	713.73	111.36	6292.12	0.778		22.32	1.898	6.44	236.51	124.55		1685.71	5.44987	0.564284	36.9574	53.0825	53.0825	1.89892
LEN_10	272.9	7.96	1845.42	10.25	0.27	85.67	0.425	5.82	10.32	2.11	42.12	14.35	170.4	64.41	283.87	67.26	701.18	109.32	9129.02	2.68		78.65	4.28	14.76	624.43	473.9		1557.52	3.82463	0.308495	61.1843	62.4577	62.4577	1.31764
LEN_11	421.68	7.73	1171.72	2.7	0.0087	41.37	0.136	2.54	5.48	2.11	25.98	9.02	111.54	41.75	181.26	41.84	444.04	68.55	7231.3	0.915		29.38	1.693	4.45	163.85	153.77		975.625	2.95082	0.539041	290.967	74.4865	74.4865	1.06555
LEN_12	546.02		1649.22	7.3	2.22	20.43	0.908	6.86	6.32	0.975	30.52	11.27	149.38	57.72	268.68	63.68	680.45	106.29	8101.2	2.59	1.18	103.87	5.9	6.87	226.48	514.41		1405.7	2.81853	0.213995	3.48126	98.9726	98.9726	0.440271
LEN_13	150.35	6.23	2153.45	5.85	0.054	16.77	0.458	11.17	14.66	0.26	65.21	21.79	242.93	82.71	325.14	64.88	607.08	86.59	6646.1	1.696	1.2	41.4	2.34	2.76	107.6	226.13		1539.7	3.44929	0.0256329	25.7983	38.0669	38.0669	0.475832
LEN_14		2.89	570.43	0.79	0.0044	17.36	0.03	0.56	1.98	1.046	10.13	3.6	43.73	17.87	84.45	21.25	252.02	46.02	9005.79	0.113	1.9	16.49	0.892	1.122	82.12	172.94		500.05	6.99115	0.71194	365.553	117.005	117.005	0.474847
LEN_15	186.88	1.96	343.81	0.89	0.683	33.01	0.18	1.39	2.33	1.36	9.04	2.68	30.02	11.19	50.99	11.67	133.86	23.92	9353.32	0.153		31.99	1.744	4.89	364.15	334.04		312.323	5.81699	0.903287	22.7765	52.8118	52.8118	1.09014
LEN_16		3.83	2051.87	16.33	0.295	12.03	0.469	6.83	11.79	1.089	56.25	19.94	230.54	80.85	319.7	65.53	586.25	79.42	6476.16	4.39		145.29	20.67	15.51	77.55	92.53		1470.98	3.71982	0.128902	7.82449	45.7093	45.7093	0.838107
LEN_17		3.98	2367.03	14.34	0.023	11.89	0.371	5.9	10.69	1.23	53.62	20.3	250.33	91.04	369.78	75.79	681.71	92.57	6305.54	5.02	0.75	221.26	30.89	20.3	101.44	140.02		1665.24	2.85657	0.156604	31.14	58.6216	58.6216	0.724468
LEN_18	193.12	12.22	501.5	1.13	0.0142	10.89	0.072	1.5	2.37	0.667	12.46	4.23	47.78	17.77	73.86	16.39	169.95	25.9	8352.87	0.458	0.89	187.38	31.07	15.89	67.74	104.39		383.853	2.46725	0.374146	82.3958	65.9187	65.9187	0.648913
LEN_19	252.99	13.35	740.79	2.29	0.029	13.7	0.325	6.05	9.97	0.848	30.26	8.79	83.3	25.5	99.87	21.14	205.42	30.59	9060.5	0.703	0.9	283.65	36.34	30.79	179.45	214.16		535.792	3.25747	0.148821	34.1403	18.9401	18.9401	0.837925
LEN_20	290.61	9.73	629.09	2.95	0.216	6.99	0.114	0.63	2.21	0.143	10.22	4.1	54.27	21.89	102.5	24.67	264.18	42.5	10758.4	1.198	1.2	239.24	30.61	12.64	68.87	171.5		534.633	2.46244	0.0917199	10.7767	109.886	109.886	0.401574
LEN_21			221.48	3.4		5.95	0.0036	0.157	0.43	0.091	2.04	1.033	14.43	6.79	36.99	10.51	133.96	24.25	11480.9	3.25	0.88	102.03	5.91	2.063	77.67	539.71		236.635	1.04615	0.29617		286.38	286.38	0.143911
LEN_22	171.36	5.67	2104.29	2.15	0.082	24.24	0.683	13.43	19.77	0.971	76.35	22.9	238.2	80.51	313.56	64.82	614.34	88.37	6043.12	0.695		10.76	0.611	1.541	63.46	64.02		1558.23	3.09353	0.0761834	24.7801	28.5652	28.5652	0.991253
LEN_23	110.67	9	373.91	2.02	0.023	17.8	0.06	1.03	1.46	0.307	7.76	2.54	31.85	12.65	58.18	15.16	166.18	27.64	9779.08	0.919		204	26.15	15.68	85.67	146.3		342.64	2.19804	0.278023	115.923	104.631	104.631	0.585578
LEN_24			526.42	1.97	0.13	10.67	0.134	2.76	4.15	0.386	15.34	4.98	54.76	19.08	79.69	17.95	174.91	27.12	8316.1	0.622		94.99	10.84	6.7	39.7	78.99		412.06	3.1672	0.147469	19.5582	38.7438	38.7438	0.502595
LEN_25	175.41	8.21	336.54	1.34	0.038	27.71	0.157	3.25	4.4	0.48	12.19	3.62	35.98	11.58	48.47	10.15	101.25	15.48	9499.81	0.451		154.71	19.55	26.98	146.74	107.32		274.755	2.97118	0.199785	86.7926	21.1533	21.1533	1.36731
LEN_26	264.24	4.77	1004.34	5.26	0.033	14.73	0.053	1.32	3.28	0.136	19.27	7.42	91.38	35.32	155.91	34.5	333.22	47.65	10728.6	2.41	1.26	379.69	47.31	24.1	162.81	336.31		744.222	2.18257	0.0521447	85.211	93.3884	93.3884	0.484107
LEN_27	254.61	25.14	771.31	1.6	0.043	11.51	0.206	3.26	4.45	0.988	20.65	6.62	76.25	26.68	112.42	26.11	267.31	41.81	7666.17	0.621		11.79	0.719	2.29	72.25	54.66		598.307	2.57649	0.314171	29.5866	55.2193	55.2193	1.32181
LEN_28	165.97	6.2	1687.04	3.38	0.228	9.78	0.562	7.56	12.76	0.67	54.01	17.12	185.57	61.15	243.23	50.68	463.41	64.46	8203.03	1.278	1.14	122.54	14.02	14	100.03	143.21		1171.19	2.64476	0.0777967	6.60984	33.3849	33.3849	0.698485
LEN_29	243.16	33.93	1176.95	0.78	0.0098	3.65	0.278	4.64	8.05	1.55	33.96	11.28	126.03	43.04	171.05	37.29	361.68	53.81	7728.35	0.294	0.65	87.7	10.76	8.37	47.08	63.38		856.318	2.65306	0.285758	16.9178	41.3014	41.3014	0.742821
LEN_30	211.55	25.41	434.26	0.615	0.0138	2.22	0.038	0.65	1.81	0.286	8.12	3.25	40.94	15.52	67.04	15.53	161.39	25.79	7815.73	0.299	1.35	46.8	6.31	3.21	17.49	35.72		342.598	2.05686	0.227404	23.4536	81.966	81.966	0.489642
LEN_31		7.07	281.58	0.76	0.119	15.83	0.038	0.58	1.38	0.243	5.92	1.98	26.16	9.57	42.23	10.27	110.38	18.97	8840.79	0.335	1.32	129.99	17.59	13.82	70.09	85.64		243.67	2.26866	0.259152	56.9513	73.5271	73.5271	0.818426
LEN_32	369.68	10.67	1018.26	2.4	0.0125	36.1	0.097	2.58	4.72	1.197	18.71	7.42	89.49	33.79	159.07	38.38	408.55	67.56	6864.79	0.789	0.89	49.12	3.14	5.7	131.17	155.96		867.677	3.04183	0.388271	250.815	79.5681	79.5681	0.841049
LEN_33	172.88	42.41	318.93	0.481	0.0172	20.44	0.107	1.98	3.94	1.76	13.23	3.42	35.08	11.43	47.59	10.14	103.97	17.21	6264.78	0.195		84.46	16.57	13.57	49.64	40.26		270.314	2.46667	0.743077	115.269	24.2576	24.2576	1.23299
LEN_34	146.48	21.92	547.58	0.549	0.032	3.07	0.123	2.18	3.65	0.315	13.68	4.82	54.44	19.15	79.59	17.11	164.42	23.68	8149.91	0.205	0.92	62.07	7.22	7.13	40.28	47.65		386.26	2.67805	0.135885	11.8386	41.4093	41.4093	0.845331
LEN_35	557.74	11.26	606.28	1.34	7.34	44.91	2.18	10.55	5.83	1.291	17.21	5.05	56.1	19.47	86.39	20.41	215.9	35.65	10050.2	0.59	1.09	478.91	97.8	47.91	180.27	223.08		528.281	2.27119	0.392872	2.71615	34.0424	34.0424	0.808096
LEN_36	185.21	4.08	599.42	23.06	0.008	7.49	0.0155	0.238	0.79	0.021	4.55	2.42	40.01	18.52	106.58	32.5	430.95	78.99	14344.7	28.38	1.12	1060.96	132.07	16.33	83.01	797.18		723.082	0.812544	0.0337636	162.727	501.459	501.459	0.10413
LEN_37	156.81	30.37	236.55	0.661	0.0214	9.01	0.07	1.57	2.03	0.685	8.07	2.25	23.01	8.26	33.21	7.4	75.34	11.81	7836.73	0.194	1.14	9.74	1.193	0.389	2.22	6.61		182.736	3.40722	0.515887	56.3192	34.1166	34.1166	0.335855
LEN_38	156.02	15.57	89.48	0.412	0.0083	2.94	0.061	1.65	2.6	0.133	7.67	1.666	12.75	3.09	9.72	1.849	15.61	2.27	9685.7	0.129	0.83	82.47	9.9	7.84	45.37	62.85		62.0173	3.1938	0.0907855	31.6105	5.51906	5.51906	0.721877
LEN_39	9398.38	23.68	545.58	1.25	341.28	578.45	50.3	168.44	26.42	3.88	44.48	7.06	63.26	19.41	73.71	14.86	142.03	21	7975.03	0.425		48.32	10.57	9.1	29.97	21.23		1554.58	2.94118	0.34501	1.06811	4.94178	4.94178	1.41168
LEN_40	229.18	4.05	576.68	3.2	0.96	12.44	0.599	4.23	3.25	0.158	12.86	4.3	52.9	20.07	88.9	19.71	206.02	33.48	8932.58	0.953		510.18	91.34	17.32	67.43	290.28		459.877	3.35782	0.0744979	3.9688	58.2723	58.2723	0.232293
LEN_41		9.21	65.23	0.99	0.0086	8.17	0.04	0.63	1.14	0.445	3.58	0.983	7.92	2.12	7.12	1.459	12.82	1.839	9153.32	0.409	1.15	64.38	8.13	7.16	38.61	48.03		48.2746	2.42054	0.671452	106.569	10.3376	10.3376	0.803873
LEN_42	213.58	8.11	320.53	2.49	0.012	24.05	0.047	0.86	1.8	0.275	6.23	2.07	24.2	9.11	46.44	12.62	151.26	27	11340.6	1.277		302.04	38.48	42.47	231.56	216		305.974	1.94988	0.250323	244.998	77.248	77.248	1.07204
LEN_43	103.02	4.24	97.42	0.316		13.13	0.0219	0.348	0.69	0.292	2.02	0.726	8.22	3	14.7	3.64	43.99	8.33	8288.79	0.308	0.75	111.44	15.18	8.3	43.61	76.72		99.1079	1.02597	0.753931		58.6058	58.6058	0.568431
LEN_44	300.9	18.31	1055.79	2.34	0.08	21.32	0.407	8.19	11.18	2.5	40.61	11.71	117.58	37.31	146.92	30.7	288.51	43.22	7978.85	0.721		62.95	7.9	9.86	55.77	46.15		760.237	3.24549	0.357645	28.5846	23.7222	23.7222	1.20845
LEN_45	452.18	6.25	856.46	3.01	0.137	27.19	0.252	3.48	8.28	0.907	30.54	9.66	96.34	30.54	117.43	23.56	222.73	32.26	9180.99	1.038	0.66	145.08	19.21	26.59	141.59	99.57		603.306	2.89981	0.173863	35.4027	24.7277	24.7277	1.42201
LEN_46	165.52	13.05	613.54	2.9	0.032	9.33	0.107	1.78	3.71	0.341	15.55	5.34	59.45	21.41	95.04	21.21	221.85	33.95	6771.24	0.917	0.76	29.92	1.647	2.085	74.43	150.9		489.1	3.16249	0.136852	38.5747	54.9694	54.9694	0.493241
LEN_47	158.58	75.26	401.32	2.34	0.025	4.21	0.055	0.9	1.75	0.196	7.73	2.83	34.95	13.64	63.94	15.43	158.87	26.77	8519.21	0.822	1.24	114.88	13.6	5.86	35.75	116.35		331.296	2.84672	0.162441	27.4675	83.4526	83.4526	0.307263
LEN_48	485.73	10.55	1311.11	1.56		5.78	0.053	1.75	4.29	0.307	23.85	9.7	123.5	46.22	206.66	46.61	468.19	71.26	9391.98	0.754	1.41	38.93	2.3	3.12	69.19	123.22		1008.17	2.06897	0.0925155		100.323	100.323	0.561516
LEN_49	8709.51	11.3	2366.11	5.25	44.67	175.84	23	141.95	57.47	7.69	116.32	27.77	261.65	85.95	339.45	69.72	654.44	99.32	7193	1.297		737.39	149.98	80.95	305.35	344.59		2105.24	4.0478	0.2867	1.32719	10.468	10.468	0.886126
LEN_50	696.8	9.68	1570.77	5.66	0.03	4.02	0.136	2.65	6.92	0.687	40.66	15.33	159.37	54.03	214.11	45.33	431.85	64.56	9876.73	1.892	1.14	889.56	112.63	26.38	147.79	645.5		1039.68	2.99154	0.124844	15.2259	57.3671	57.3671	0.228954
LEN_51	137.68		292.81	1.36	0.04	24.09	0.0252	0.355	0.91	0.279	5.25	1.944	22.57	8.67	44.25	11.69	139.22	25.65	10653.8	0.611	1.19	277.27	47.51	32.76	148.86	157.6		284.943	2.22586	0.389092	183.567	140.636	140.636	0.944543
LEN_52	194.21	3.37	850.42	3.43	0.033	27.99	0.055	1.03	2.62	1.046	14.58	5.09	66.79	26.99	133.47	33.71	392.67	70.05	9586.26	0.86	0.94	50.55	2.91	5.59	213.93	279.54		776.124	3.98837	0.515883	158.947	137.772	137.772	0.765293
LEN_53	148.48	26.31	88.12	15.6	0.124	6.12	0.453	4.83	4.58	2.29	8.42	2.059	14.3	3.75	11.1	1.771	15.09	2.062	8176.22	5.66	0.48	42.48	2.93	6.74	107.28	93.12		76.949	2.75618	1.12408	6.24711	3.02872	3.02872	1.15206
LEN_54		1.7	13.46	0.468	0.004	0.54	0.0125	0.081	0.103	0.083	0.66	0.164	1.59	0.488	1.98	0.414	4.35	0.656	8606.35	0.289		4.24	0.27	0.587	7.66	8.5		11.1255	1.61938	0.970368	18.4755	38.8229	38.8229	0.901176
LEN_55	404.91	6.55	1154.67	2.46	1.604	37.15	0.814	9.32	10.44	2.17	34.12	10.61	113.88	39.6	166.17	37.27	373.52	57.33	8463.77	0.515	1.17	43.12	2.46	6.09	201.49	217.01		893.998	4.7767	0.350473	7.8656	32.8889	32.8889	0.928483
LEN_56	322.57		2917.81	28.93	0.162	1.471	0.189	1.24	0.76	0.4	7.18	6.37	151.17	86.22	514.66	141.16	1615.67	268.66	11294.5	4.98	1.17	317.42	18.88	0.197	6.77	1545.15		2795.31	5.80924	0.521963	2.03382	1954.23	1954.23	0.00438145
LEN_57		1.14	59.46	0.583		1.316				0.046	0.5	0.187	3.05	1.822	10.93	3.51	50.29	12.51	8786.96	0.155		3.28	0.222	0.139	6.42	21.86		84.161	3.76129					0.293687
LEN_58	140.9	9.01	206.13	1.53		4.52	0.049	1.07	1.48	0.08	6.32	2.057	20.58	7.13	29.3	6.49	65.79	10.22	9456.35	0.333		134.69	17.25	6.57	34.75	95.18		155.086	4.59459	0.0797351		40.8634	40.8634	0.365098
LEN_59	299.9	7.12	1248.34	3.65	0.0168	31.21	0.119	1.69	2.77	1.275	14.67	6.72	89.04	38.68	193.49	50.43	603.56	111.9	8310.24	1.258	0.62	76.39	4.29	11.35	413.97	400.24		1145.57	2.90143	0.609683	168.87	200.298	200.298	1.0343
LEN_60	324.03	7.66	1105.8	2.71	0.025	26.81	0.12	1.64	2.58	1.316	15.67	6.13	82.27	34.24	173.06	45.4	533.63	99.06	8223.41	0.952		59.44	3.27	9.23	347.37	321.38		1021.95	2.84664	0.6309	118.42	190.133	190.133	1.08087
*Empty cells are filtered-out trace-element contents below quantification limits

## Sheet: Ruslovaya
	P31	Ti49	Y89	Nb93	La139	Ce140	Pr141	Nd143	Sm147	Eu151	Gd155	Tb159	Dy163	Ho165	Er166	Tm169	Yb173	Lu175	Hf179	Ta181	Pb204	Pb206	Pb207	Pb208	Th232	U238		ΣREE	Nb/Ta	Eu/Eu*	Ce/Ce*	Yb/Sm	Yb/Smn	Th/U
RU_1	173.63	39.39	954.67	1.72	0.16	24.36	0.83	9.17	11.31	1.18	35.89	9.47	102.23	32.13	132.54	28.53	289.11	42.12	8353.68	0.939	1.72	52.97	3.01	6.6	259.47	292.39		719.03	1.83174	0.178531	16.1721	25.5623	23.4983	0.887411
RU_2		2.81	204.42	0.563		22.05	0.048	0.5	0.76	0.276	2.76	0.914	12.58	5.53	32.83	9.34	131.74	26.36	8768	0.081	1.45	45.4	2.54	3.5	132.38	229.29		245.688	6.95062	0.580894		173.342	159.346	0.577347
RU_3	277.4	5.04	1298.12	2.96	0.024	54.08	0.199	3.75	9.1	2.35	36.92	12.15	130.02	43.75	186.34	42.26	423.28	65.28	9245.39	1.158		442.61	83.67	63.56	285.66	246.54		1009.5	2.55613	0.39081	189.318	46.5143	42.7585	1.15868
RU_4	245.62	14.48	262.73	1.24	0.117	6.84	0.175	1.46	2.16	0.374	7.78	2.37	26.4	9.28	40.5	9.89	101.09	17.57	9661.83	0.406		262.13	35.15	9.64	55.85	183.57		226.006	3.05419	0.278102	11.5646	46.8009	43.022	0.304244
RU_5	182.03	298.36	521.06	15.67	132.1	274.58	34.86	142.59	21.31	0.583	22.88	4.28	48.49	18.32	85.7	20.44	214.94	31.04	11364.2	5.81		371.34	72.9	14.34	65.49	200.03		1052.11	2.69707	0.0804818	0.978907	10.0863	9.27192	0.327401
RU_6	158.05	12.64	755.63	0.85		5.43	0.062	0.84	2.81	0.729	16.71	6.15	74.12	25.62	110.76	25.33	268.9	39.03	7853.36	0.35	1.69	33.76	2.21	2.64	54.99	110.65		576.491	2.42857	0.324291		95.694	87.9671	0.496972
RU_7	356.23	23.1	2091.22	2.65	0.049	7.34	0.27	4.37	8.4	2.31	47.84	17.95	206.29	73.71	308.38	67.12	678.15	97.94	6326.31	0.865	1.43	85.68	5.43	9.68	204.91	275.32		1520.12	3.06358	0.351258	15.4385	80.7321	74.2134	0.744261
RU_8	382.45	7.01	1540.2	5.7	2.42	68.81	0.861	7.94	9.49	1.79	38.47	13.42	150.19	54.41	231.77	51.31	525.55	77.26	8973.72	1.689		28.3	1.96	4.72	199.01	174.19		1233.69	3.37478	0.285567	11.5327	55.3793	50.9077	1.14249
RU_9	160.74	7	321.79	1.99	0.017	16.29	0.081	1.23	1.67	0.287	7.22	2.5	28.92	10.47	49.19	12.09	135.85	21.51	9843.99	0.829	2.26	19.54	1.063	1.808	63.82	109.99		287.325	2.40048	0.251944	106.204	81.3473	74.7789	0.580235
RU_10		10.29	498.41	1.42	0.0058	6.37	0.036	0.79	1.52	0.384	8.56	2.97	38.71	15.66	79.88	20.83	251.95	44.48	9305.07	0.512	1.67	94.14	11.61	4.63	55.6	163.48		472.146	2.77344	0.324505	106.65	165.757	152.373	0.340103
RU_11	464.02	4.84	1016.25	2.81		29.75	0.163	2.87	6.93	0.37	29.27	10.17	107.34	36.29	146.84	31.49	317.37	47.69	10097.1	1.046	1.21	678.37	137.81	65.2	245.24	328.93		766.543	2.68642	0.0791904		45.7965	42.0987	0.745569
RU_12	336.88	5.04	678.3	1.73	0.0163	28.27	0.166	3.32	6.17	1.35	22.06	7.06	72.3	23.86	102.15	22.47	240.84	37.32	8362.41	0.421		193.03	40.78	27.9	105.09	92.46		567.352	4.10926	0.352726	131.482	39.034	35.8822	1.1366
RU_13	7764.11	20.88	1271.74	1.62	95.53	225.25	26.17	124.1	32.98	7.36	61.01	14.52	142.83	45.86	185.8	40.64	416.96	62.65	7093.97	0.482	1.61	13.34	1.053	4.08	145.97	75		1481.66	3.361	0.500151	1.08989	12.6428	11.622	1.94627
RU_14	145.8	11.95	399.48	0.64		19.71	0.06	0.93	2.67	0.939	10.2	3.25	39.79	14.11	61.62	13.86	148.7	22.84	7595.93	0.299	1.26	6.56	0.366	1.281	50.56	39.47		338.679	2.14047	0.548478		55.6929	51.1959	1.28097
RU_15	680.27	6.06	3758.45	13.18	0.042	190.53	0.556	9.95	23.94	4.16	121.42	41.95	446	147.62	563.16	112.87	1042.16	140.1	5131.83	2.2		39.68	2.22	9.09	403.54	263.91		2844.46	5.99091	0.235199	301.64	43.5322	40.0171	1.52908
RU_16		4.9	517.63	2.17	0.009	6.33	0.045	0.73	1.62	0.096	9.71	3.64	45.43	17.73	82.34	20.74	228.88	35.28	7823.88	1.278	1.87	10.4	0.583	0.622	27.8	63.65		452.58	1.69797	0.0737825	76.0964	141.284	129.876	0.436764
RU_17	109.58	25.94	24.84	0.471	0.0097	25.23	0.142	1.89	1.67	0.646	2.82	0.485	3.81	0.831	2.07	0.421	3.26	0.485	10680.8	0.073	1.41	464.5	61.22	49.01	241.38	308.18		43.7697	6.45205	0.9074	164.466	1.9521	1.79447	0.783244
RU_18	162.91	20.51	200.17	0.7	0.0146	24.95	0.052	1.47	1.57	0.247	5.18	1.727	19.04	6.8	28.63	6.61	71.7	10.89	9417.27	0.487	1.82	99.71	13.14	24.92	118.65	63.73		178.881	1.43737	0.264017	219.069	45.6688	41.9812	1.86176
RU_19	121.64		1750.95	5.36	0.028	163.52	0.255	4.3	6.53	1.74	32.62	11.79	146.11	54.91	241.34	55.63	573.94	85.35	6677.31	0.625		26.02	1.363	6.22	468.63	285.44		1378.06	8.576	0.363412	468.176	87.8928	80.7959	1.64178
RU_20	140.22	4.55	367.92	14.28		13.95	0.0132	0.55	1.01	0.061	5.16	2.35	29.7	12.95	63.29	15.69	170.85	26.03	10368.2	6.41	1.02	315.93	38.73	13.89	84.13	257.9		341.604	2.22777	0.0814504		169.158	155.5	0.326212
RU_21	225.18	7.14	672.33	1.34	9.81	45.82	2.17	10.05	4.99	0.898	19.5	6.34	69.82	23.98	95.75	20.28	194.05	29.4	9867.34	0.258	1.19	259.26	34.55	92.65	464.71	169.68		532.858	5.1938	0.277497	2.40258	38.8878	35.7478	2.73874
RU_22	213.73	110.79	698.04	6.95	42.6	104.26	7.11	30.06	8.98	1.021	22.71	6.76	72.75	24.42	103.61	22.6	224.64	32.98	11109.2	1.812	2.32	486.45	63.21	77.19	429.89	356.84		704.501	3.83554	0.217936	1.44933	25.0156	22.9957	1.20471
RU_23	342.5	8.22	1364.92	1.99	0.0207	26.19	0.295	5.05	8.86	1.056	35.58	11.3	129.39	47.72	203.8	47.05	476.75	76.01	8558.99	0.929	1.15	360.11	66.58	66.88	261	179.94		1069.07	2.14209	0.181298	81.0825	53.8093	49.4644	1.45048
RU_24	682.54	12.94	1021.25	2.12	0.0212	13.22	0.0261	1.08	2.65	0.378	13	6.63	90.72	32.89	148.57	36.11	387.55	59.73	10964.7	1.513	1.18	1087.07	136.25	20.1	110.42	749.65		792.575	1.40119	0.196312	135.966	146.245	134.437	0.147295
RU_26	192.82	27.69	515.83	4.94	4.64	56	1.734	9.91	6.15	1.99	14.31	4.79	49.19	17	74.84	18.86	211.94	34.34	8799.68	2.3		362.35	44.41	36.13	214	317.43		505.694	2.14783	0.646613	4.77631	34.4618	31.6792	0.674164
RU_27	160.26	3.66	1245.42	4.42		34.21	0.162	4.2	8.34	0.885	34.57	12.13	134.14	47.42	188.5	39.31	374.75	52.8	5546.61	1	0.87	420.28	85.61	32.87	121.14	195.75		931.417	4.42	0.158876		44.9341	41.3058	0.618851
RU_28	424.82	3.52	4804.05	38.43	70.26	243.62	24.69	119.18	55.05	1.6	144.22	50.46	563.76	188.18	735.47	150.34	1335.67	174.28	5887.02	5.32	2.99	113.77	8.45	14.53	546.06	705.62		3856.78	7.22368	0.0547366	1.4151	24.2629	22.3037	0.773873
RU_29	171.73	15.31	284.93	1.06	0.0039	17.71	0.054	0.92	1.92	0.222	6.89	2.36	27.18	9.75	41.69	9.43	99.39	15.02	9985.13	0.609	1.21	56.22	7.4	33.98	172.36	38.3		232.54	1.74056	0.186055	295.241	51.7656	47.5858	4.50026
RU_30	168.59	14.8	349.52	1.41		9.57	0.082	1.23	2.03	0.381	9.61	3.08	34.29	12.04	52.04	11.5	117.71	17.98	7984.68	0.348		51.83	7.04	7.31	35.84	34.25		271.543	4.05172	0.262945		57.9852	53.3032	1.04642
RU_31	2042.93	7.92	1001.67	2.56	27.65	92.58	8.43	36.47	11.54	1.359	25.37	7.65	86.17	33.37	156.57	37.29	421.47	69.02	7919.22	0.888	1.23	42.59	2.59	4.68	145.61	192.08		1014.94	2.88288	0.242106	1.46705	36.5225	33.5735	0.75807
RU_32	75.57	9.17	195.19	1.22	0.133	13.64	0.046	0.68	0.89	0.296	2.95	1.079	15.08	5.9	29.78	8.18	105.05	19.38	9865.3	0.766	1.24	523.3	69.53	27.74	152.92	378		203.084	1.59269	0.556845	42.1888	118.034	108.503	0.40455
RU_33	214.76		770.56	18.9	0.151	12.36	0.134	1.47	2.03	0.087	11.53	4.77	63.31	25.81	126.08	31.25	340.55	52.92	10130.1	9.13		651	78.69	27.78	153.65	524.8		672.452	2.0701	0.0548158	21.0216	167.759	154.213	0.292778
RU_34	180.2	5.7	303.63	0.8	0.045	7.24	0.082	0.86	1.16	0.154	5.14	2.014	25.39	10.21	47.09	11.51	117.75	19.54	5979.24	0.419		123.16	13.55	7.42	63.16	153.11		248.185	1.90931	0.192247	28.8345	101.509	93.3123	0.412514
RU_35	142.32	22.04	342.27	2.63	0.028	8.81	0.089	1.25	2.11	0.208	8.94	2.72	33.53	12.02	53.75	12.44	131.46	20.19	9120.06	0.878		66.33	8.26	5.42	28.6	45.3		287.545	2.99544	0.145983	42.6962	62.3033	57.2726	0.631347
RU_36	211.86	2.4	1098.25	3.62	0.0042	11.3	0.072	1.14	3.83	0.429	20.46	7.98	99.43	37.77	167.5	37.76	388.17	58.85	8623.81	1.373		69.2	3.71	5.71	317.59	539.42		834.695	2.63656	0.147725	157.208	101.35	93.1663	0.588762
RU_37	129.72	12.01	281.97	0.98	0.0123	16.15	0.057	1.14	1.47	0.688	7.82	2.62	27.81	9.4	40.79	9.12	97.38	14.82	7882.71	0.317	1.04	65.82	12.45	7.21	28.05	32.29		229.277	3.09148	0.618551	147.561	66.2449	60.8959	0.86869
RU_38	106.76	13.39	1503.2	1.34	0.067	85.3	0.755	16.92	26.56	12.77	80.18	21.06	188.95	54.14	191.69	37.44	344.88	46.64	5574.44	0.308	0.95	13.72	0.741	4.87	354.56	147.28		1107.35	4.35065	0.843515	91.7542	12.9849	11.9365	2.40739
RU_39	293.17	6.33	1107.43	17.46	0.0078	22.14	0.054	1.14	1.82	0.15	10.65	5.49	77.77	32.95	173.1	48.24	566.95	89.1	10624.6	16.69	1.66	1610.65	404.08	63.41	212.43	667.28		1029.56	1.04614	0.103856	260.988	311.511	286.358	0.318352
RU_40	173.58	4.61	318.74	1.03	0.043	12.24	0.134	2.72	3.96	0.625	11.33	3.31	34.31	10.9	43.76	9.53	96.6	14.48	6626.31	0.398	1	147.08	18.64	10.44	58.02	104.4		243.942	2.58794	0.284424	39.0106	24.3939	22.4242	0.555747
RU_41	414.56		1830.62	2.46	1.379	38.86	0.739	9.92	13.02	2.85	56.77	17.92	196.21	68.16	271.05	56.35	547.69	80.21	7727.55	0.753	3.44	959.08	192.34	100.96	381.56	451.97		1361.13	3.26693	0.319543	9.31293	42.0653	38.6687	0.844215
RU_42	280.68	4.67	855.25	2.07	0.055	5.52	0.098	2.14	4.23	0.255	22.04	7.72	85.7	30.52	126.53	27.56	266.44	39.85	8572.75	0.856	1.46	304.26	38.77	20.9	110.79	213.62		618.658	2.41822	0.0805032	18.19	62.9882	57.9022	0.518631
RU_43	264.49		1245.75	3		92.07	0.263	4.72	13.04	1.84	50.58	15.31	152.39	46.78	174.28	34.91	321.87	45.21	5781.09	0.972	1.31	279.48	55.64	52.61	183.69	126.19		953.263	3.08642	0.218393		24.6833	22.6902	1.45566
RU_44	240.85	53.23	2535.62	5.31	0.518	21.6	0.435	6.66	10.8	0.809	55.83	20.74	254.03	94.3	395.53	82.42	783.41	113.86	7819.13	1.397	1.12	970.21	204.26	68.55	245.13	429.34		1840.94	3.801	0.100427	11.0086	72.538	66.6809	0.570946
RU_45	207.84		244.34	1.49	0.383	3.96	0.372	4.02	6.35	0.706	27.17	6.68	41.9	8.44	23.83	4.16	37.17	4.88	10364.2	0.988		768.64	100.72	6.41	31.91	500.79		170.021	1.5081	0.163841	2.53812	5.85354	5.3809	0.0637193
RU_46	354.3	7.12	946.58	3.64	0.048	20.42	0.279	5.57	8.51	1.8	28.7	9.1	98.34	33.14	135.31	29.89	308.57	46.56	8066.35	1.526		764.41	103.39	68.61	362.22	505.84		726.237	2.38532	0.351088	42.6895	36.2597	33.3319	0.716076
RU_47	838.52	12.8	4633.11	18.92	348.34	798.35	91.87	370.64	82.1	5.48	147.66	47.02	521.78	175.66	686.66	137.79	1229.33	156.15	8031.4	3.26	7.83	79.72	9.09	14.91	453.93	486.52		4798.83	5.80368	0.151714	1.07967	14.9736	13.7645	0.933014
RU_48	400.83	8.04	562.07	1.13	2.63	29.98	0.681	3.83	3.01	0.803	11.12	4.52	51.51	19.34	84.81	20.6	228.39	35.14	8629.19	0.53	0.98	13.44	0.74	1.717	99.18	117.6		496.364	2.13208	0.423086	5.41961	75.8771	69.7504	0.843367
RU_49	418.45	252.16	1148.71	2.48	13.53	70.24	12.39	74.54	47.42	15.91	71.43	21.92	195.66	45.04	142.13	27.36	245.75	26.51	7732.43	0.881	8.06	1165.49	132.87	33.13	275.97	1519.96		1009.83	2.81498	0.833294	1.31246	5.18241	4.76396	0.181564
RU_50	199.51	6.77	1479.4	0.91	0.042	9.8	0.479	7.18	11.07	0.933	39.81	13.05	148.74	53.38	230.59	52.41	539.76	77.75	8523.81	0.775	1.08	54.62	3.02	5.73	225.08	311.17		1184.99	1.17419	0.135475	16.7156	48.7588	44.8218	0.723335
RU_51	163.75	5.25	3527.03	4.94	0.112	34.75	1.052	19.02	36.69	0.998	126.14	40.51	430.94	143.07	546.53	111.21	1044.23	143.51	4499.24	1.288	1.33	32.53	1.835	3.84	162.93	201.49		2678.76	3.8354	0.0447177	24.4921	28.4609	26.1628	0.808626
RU_52	251.86	5.08	1146.82	4.08	0.0094	46.58	0.28	3.61	6.59	1.72	26.04	9.34	109.5	39	173.07	41.15	440.75	61.58	8645.76	1.329	1.22	31.51	1.914	5.91	225.71	175.16		959.219	3.06998	0.400234	219.657	66.8816	61.4813	1.28859
RU_53	206.28	28.17	190.61	1.05	0.0045	3.05	0.104	1.84	2.79	0.291	8.05	2.15	19.99	6.56	24.98	5.65	58.9	8.62	7466.6	0.249	1.11	106.13	13.73	5.91	31.07	74.79		142.98	4.21687	0.187172	34.1087	21.1111	19.4065	0.41543
RU_54	265.54	7.16	782.75	1.56	0.043	16.19	0.217	3.76	7.07	1.153	27.92	8.36	84.58	28.7	111.24	24.15	229.56	33	7737.13	0.533	1.09	160.24	20.57	22.94	124	113.87		575.943	2.92683	0.250156	40.5481	32.4696	29.8478	1.08896
RU_55	453.37	5.88	4157.87	19.31	0.0174	125.17	0.233	4.71	11.87	2.64	62.37	29.13	389.94	153.68	664.27	144.67	1343.47	172.13	5473.52	2.67	1.32	29.04	1.523	2.63	108.74	182.78		3104.3	7.23221	0.29576	475.593	113.182	104.043	0.594923
RU_56	89.89	9.46	65.34	0.522		3.6	0.036	0.44	0.93	0.21	2.9	0.894	7.73	2.11	6.87	1.352	13.15	1.765	9131.93	0.404	1.06	371.27	43.76	7.64	41.96	270.79		41.987	1.29208	0.389787		14.1398	12.9981	0.154954
RU_57		9.1	276.51	0.417	0.0042	4.78	0.0223	0.42	1.12	0.234	5.12	1.81	22.42	9.02	43.21	10.57	118.85	19.51	7886.04	0.229		160.14	22.29	6.62	30.29	100.45		237.09	1.82096	0.297866	119.492	106.116	97.5477	0.301543
RU_58		5.45	56.72	0.283		0.629	0.0031	0.084	0.87	0.577	3.99	0.99	7.43	1.777	5.71	1.083	9.16	1.408	9662.83	0.162		75.41	9.53	0.159	0.875	51.54		33.7111	1.74691	0.944015		10.5287	9.67859	0.0169771
RU_59	253.69	14.69	387.71	1.59	0.0122	3.53	0.087	1.52	3.14	0.057	13.25	4.22	42.1	13.36	50	10.38	99.2	13.36	9275.96	0.547		454.51	59.49	9.06	43.36	298.38		254.216	2.90676	0.0269371	26.2134	31.5924	29.0414	0.145318
RU_60	109.12	4.15	263.69	0.551	0.0234	3.12	0.0149	0.42	0.64	0.209	4.08	2.03	23.76	8.81	41.19	9.68	105.61	17.61	10003.9	0.561	1.08	960.49	207.14	10.4	37.92	423.2		217.197	0.982175	0.394253	40.4242	165.016	151.691	0.089603
*Empty cells are filtered-out trace-element contents below quantification limits
